# Supplementary material
Source: MDPI journal article supplement (https://www.mdpi.com/2073-4352/7/3/78)

Article

# Supplementary Materials: Unexpected Au alloying in tailoring In-doped SnTe nanostructures with gold nanoparticles

Samuel Atherton <sup>1</sup>, Benjamin Steele <sup>1</sup> and Satoshi Sasaki <sup>1\*</sup><sup>1</sup> School of Physics and Astronomy, University of Leeds, Leeds, LS2 9JT, United Kingdom

\* Correspondence: s.sasaki@leeds.ac.uk; Tel.: +44-113-343-3578

Academic Editor: Helmut Cölfen

Received: 27 December 2016; Accepted: 1 March 2017; Published: date

## S1. Detection of a tiny GNP in EDX spectroscopy

It is a challenge to identify the detection limit of each element in a range of the dimensions of each object. Au spectrum from a tiny amount of Au in a gold nanoparticle (GNP) were measured using energy dispersive X-ray (EDX). We confirmed that a peak around 2.1 keV in EDX spectra in Figure S1 can be identified as Au, and hence, one ~20-nm GNP on a Si substrate is detectable using EDX. This successfully indicates that the amount of Au in a ~20-nm GNP is above the detection limit.

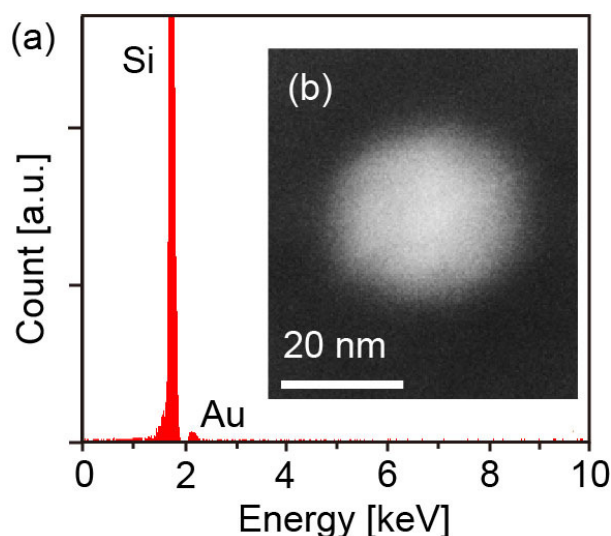

**Figure S1.** (Color online) Investigation of the detection limit with respect to Au in energy dispersive X-ray (EDX) spectroscopy. (a) EDX spectra taken from a point analysis of one ~20-nm GNP isolated from others on a Si substrate. The inset is (b) scanning electron microscope (SEM) topography of a ~20-nm GNP. Scale bar in (b) is 20 nm.

## S2. Au alloying with In-doped SnTe in a high-temperature VTG with the use of GNPs

Figure S2 indicates that In-doped SnTe nanostructure grown with a high-temperature VTG method with the use of 20-nm GNPs formed an alloy with Au. It is reassuring that the unexpected feature of Au alloying with In-SnTe is exactly reproduced in two different samples.

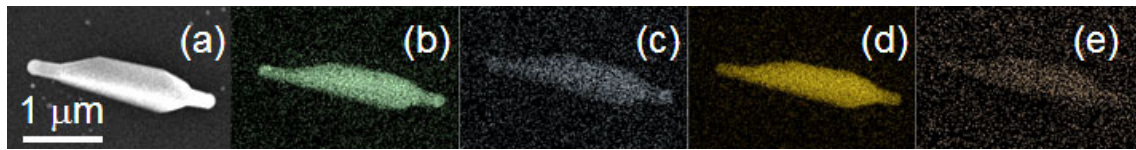

**Figure S2.** (Color online) Investigation of the constituent elements in the In-SnTe nanostructure grown by the vapor transport growth (VTG) method on a Si substrate under the V-L-S mechanism with the use of 20-nm GNPs demonstrating a reproducibility of Au alloying shown in Figure 3 in the main article. (a) Scanning electron microscope topography of a typical nanorod sample. (b)-(e) Energy dispersive X-ray (EDX) spectroscopy elemental mappings for (b) Sn, (c) In, (d) Te, and (e) Au of the sample in (a), respectively. Scale bar in (a) is 1  $\mu\text{m}$ .

### S3. Phase diagram of binary gold alloys; Au-SnTe

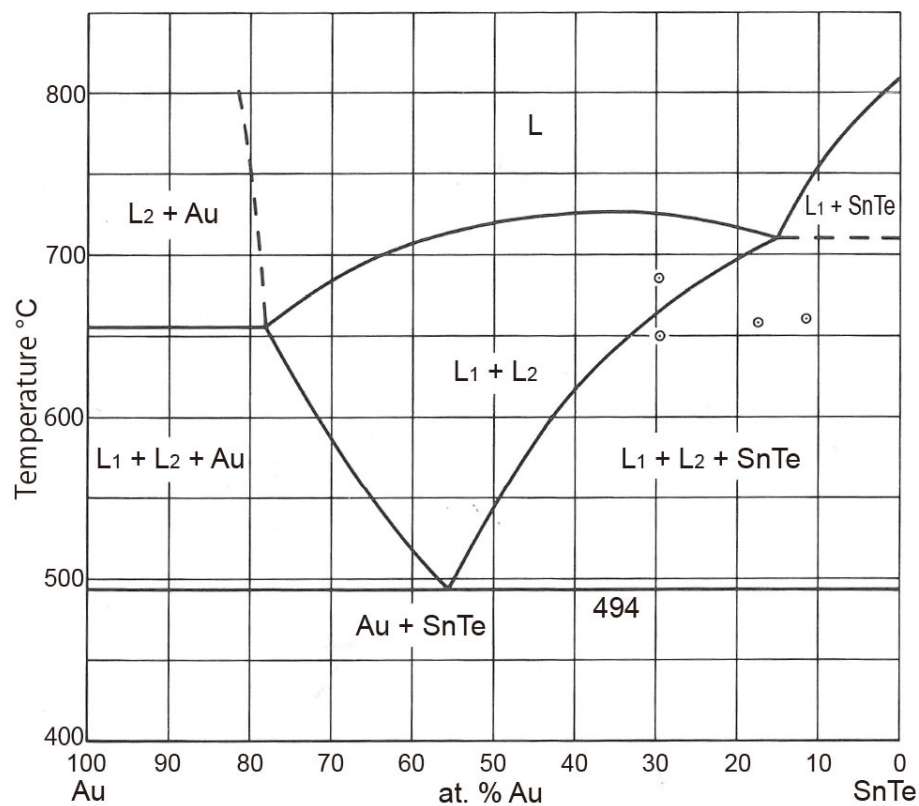

**Figure S3.** The concentration of Au vs. temperature phase diagram of ternary gold alloys Au-Sn-Te (or more specifically, Au-SnTe) [1].  $L_1$  and  $L_2$  indicate two different liquid phases with different compositions. It is suggested that  $L_1$  has a composition of 28 atomic percent (at. % or at%) Au, 27 at% Sn, 45 at% Te and  $L_2$  has a composition of 80 at% Au, 18 at% Sn, 2 at% Te in Ref. [1].

### References

1. Prince, A.; Raynor, G. V.; Evans, D. S. Ternary systems Au-Sn-Te. In *Phase Diagram of Ternary Gold Alloys*; The Institute of Metals: London, UK, 1990; pp. 456-466; corresponding to Ref. [41] in the main article.

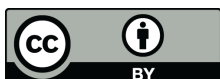

Supplement: s1 [file s1]
